# Supplementary material for: Optimal Pharmacologic Treatment of Heart Failure With Preserved and Mildly Reduced Ejection Fraction: A Meta-analysis
Source: PubMed Central journal article supplement (PMC9490501; doi:10.1001/jamanetworkopen.2022.31963), 2022-09-20
Supplement: jamanetwopen-e2231963-s001.pdf [file jamanetwopen-e2231963-s001.pdf]

## Supplementary Online Content

Xiang B, Zhang R, Wu X, Zhou X. Optimal pharmacologic treatment of heart failure with preserved and mildly reduced ejection fraction: a meta-analysis. *JAMA Netw Open*. 2022;5(9):e2231963.

doi:10.1001/jamanetworkopen.2022.31963

### **eAppendix.** Search Strategies

**eFigure 1.** Flowchart of Study Selection Process

**eFigure 2.** Bias Assessment of Eligible Studies

**eFigure 3.** Primary Network Meta-analysis Results for All-Cause Death (A), Cardiovascular Death (B) and Hospitalization for Heart Failure (C)

**eFigure 4.** Rankogram Plot for All-Cause Mortality (A), Cardiovascular Mortality (B), and Hospitalization for Heart Failure (C) in the Primary Analysis

**eFigure 5.** Sensitivity Analysis Results for All-Cause Death (A) and Hospitalization for Heart Failure (B)

**eFigure 6.** Rankogram Plot for All-Cause Mortality (A) and Hospitalization for Heart Failure (B) in Sensitivity Analysis

**eTable 1.** Study Characteristics of Included RCTs

**eTable 2.** Baseline Characteristics of Included Intervention and Concomitant Drug Classes Reported

**eTable 3.** Additional Sensitivity Analysis

### **eReferences**

This supplementary material has been provided by the authors to give readers additional information about their work.

## eAppendix. Search Strategies

|             |                                                                                                                                                                                                                                                                                                                                                                                                                                                                                                                                                                                                                                                                                                                                                                                                                                                                                                                                                                                                                                                                                                                                                                                                                                                                                                                                                                                                                                                                                                                                                                                                                                                                                                                                                                                                                                                                                                                                                                                                                                                                                                                                                                                                                                                                                                                                                                                                                                                                                                                                                                                                                                                                                                                                                                                                                                                                            |
|-------------|----------------------------------------------------------------------------------------------------------------------------------------------------------------------------------------------------------------------------------------------------------------------------------------------------------------------------------------------------------------------------------------------------------------------------------------------------------------------------------------------------------------------------------------------------------------------------------------------------------------------------------------------------------------------------------------------------------------------------------------------------------------------------------------------------------------------------------------------------------------------------------------------------------------------------------------------------------------------------------------------------------------------------------------------------------------------------------------------------------------------------------------------------------------------------------------------------------------------------------------------------------------------------------------------------------------------------------------------------------------------------------------------------------------------------------------------------------------------------------------------------------------------------------------------------------------------------------------------------------------------------------------------------------------------------------------------------------------------------------------------------------------------------------------------------------------------------------------------------------------------------------------------------------------------------------------------------------------------------------------------------------------------------------------------------------------------------------------------------------------------------------------------------------------------------------------------------------------------------------------------------------------------------------------------------------------------------------------------------------------------------------------------------------------------------------------------------------------------------------------------------------------------------------------------------------------------------------------------------------------------------------------------------------------------------------------------------------------------------------------------------------------------------------------------------------------------------------------------------------------------------|
| Database    | PubMed                                                                                                                                                                                                                                                                                                                                                                                                                                                                                                                                                                                                                                                                                                                                                                                                                                                                                                                                                                                                                                                                                                                                                                                                                                                                                                                                                                                                                                                                                                                                                                                                                                                                                                                                                                                                                                                                                                                                                                                                                                                                                                                                                                                                                                                                                                                                                                                                                                                                                                                                                                                                                                                                                                                                                                                                                                                                     |
| Search time | October 9th 2021                                                                                                                                                                                                                                                                                                                                                                                                                                                                                                                                                                                                                                                                                                                                                                                                                                                                                                                                                                                                                                                                                                                                                                                                                                                                                                                                                                                                                                                                                                                                                                                                                                                                                                                                                                                                                                                                                                                                                                                                                                                                                                                                                                                                                                                                                                                                                                                                                                                                                                                                                                                                                                                                                                                                                                                                                                                           |
| Strategy    | <p>1. heart failure[Title/Abstract] OR cardiac failure[Title/Abstract] OR cardiac insufficiency[Title/Abstract] OR cardiomyopathy[Title/Abstract]</p> <p>2. "Heart Failure"[Mesh]</p> <p>3. #1 or #2</p> <p>4. LCZ696[Title/Abstract] OR LCZ 696[Title/Abstract] OR LCZ-696[Title/Abstract] OR valsartan[Title/Abstract] OR sacubitril[Title/Abstract] OR angiotensin receptor-neprilysin inhibitor[Title/Abstract]</p> <p>5. "Angiotensin-Converting Enzyme Inhibitors"[Mesh]</p> <p>6. angiotensin converting enzyme inhibitor[Title/Abstract] OR ACEI[Title/Abstract] OR benazepril[Title/Abstract] OR captopril[Title/Abstract] OR enalapril[Title/Abstract] OR fosinopril[Title/Abstract] OR imidapril[Title/Abstract] OR lisinopril[Title/Abstract] OR moexipril[Title/Abstract] OR perindopril[Title/Abstract] OR quinapril[Title/Abstract] OR ramipril[Title/Abstract] OR trandolapril[Title/Abstract] OR zofenopril[Title/Abstract] OR alacepril[Title/Abstract] OR cilazapril[Title/Abstract] OR spirapril[Title/Abstract] OR delapril[Title/Abstract]</p> <p>7. "Adrenergic beta-Antagonists"[Mesh]</p> <p>8. beta blocker[Title/Abstract] OR BB[Title/Abstract] OR acebutolol[Title/Abstract] OR atenolol[Title/Abstract] OR betaxolol[Title/Abstract] OR bisoprolol[Title/Abstract] OR carvedilol[Title/Abstract] OR labetalol[Title/Abstract] OR metoprolol[Title/Abstract] OR nadolol[Title/Abstract] OR nebivolol[Title/Abstract] OR penbutolol[Title/Abstract] OR pindolol[Title/Abstract] OR propranolol[Title/Abstract] OR sotalol[Title/Abstract] OR timolol[Title/Abstract]</p> <p>9. "Mineralocorticoid Receptor Antagonists"[Mesh]</p> <p>10. aldosterone antagonist[Title/Abstract] OR mineralocorticoid-receptor antagonist[Title/Abstract] OR MRA[Title/Abstract] OR eplerenone[Title/Abstract] OR spironolactone[Title/Abstract]</p> <p>11. "Angiotensin Receptor Antagonists"[Mesh]</p> <p>12. angiotensin receptor blocker[Title/Abstract] OR angiotensin receptor antagonist[Title/Abstract] OR ARB[Title/Abstract] OR azilsartan[Title/Abstract] OR candesartan[Title/Abstract] OR eprosartan[Title/Abstract] OR irbesartan[Title/Abstract] OR losartan[Title/Abstract] OR olmesartan[Title/Abstract] OR telmisartan[Title/Abstract] OR valsartan[Title/Abstract]</p> <p>13. "Sodium-Glucose Transporter 2 Inhibitors"[Mesh]</p> <p>14. sodium-glucose cotransporter 2 inhibitor[Title/Abstract] OR sodium-glucose transporter 2 inhibitor[Title/Abstract] OR empagliflozin[Title/Abstract] OR dapagliflozin[Title/Abstract] OR canagliflozin[Title/Abstract] OR ertugliflozin[Title/Abstract] OR sotagliflozin[Title/Abstract] OR remogliflozin[Title/Abstract] OR ipragliflozin[Title/Abstract] OR tofogliflozin[Title/Abstract]</p> <p>15. #4 or #5 or #6 or #7 or #8 or #9 or #10 or #11 or #12 or #13 or #14</p> <p>16. #3 and #15</p> |

|             |                                                                                                                                                                                                                                                                                                                                                                                                                                                                                                                                                                                                                                                                                                                                                                                                                                                                                                                                                                                                                                                                                                                                                                                                                                                                                                                                                                                                                                                                                                                                                                                                                                                                                                                                                                                                                                                                                                                                                                                                                                                                                                                                                                                                                                                                                                                                                                                                                                                                                                           |
|-------------|-----------------------------------------------------------------------------------------------------------------------------------------------------------------------------------------------------------------------------------------------------------------------------------------------------------------------------------------------------------------------------------------------------------------------------------------------------------------------------------------------------------------------------------------------------------------------------------------------------------------------------------------------------------------------------------------------------------------------------------------------------------------------------------------------------------------------------------------------------------------------------------------------------------------------------------------------------------------------------------------------------------------------------------------------------------------------------------------------------------------------------------------------------------------------------------------------------------------------------------------------------------------------------------------------------------------------------------------------------------------------------------------------------------------------------------------------------------------------------------------------------------------------------------------------------------------------------------------------------------------------------------------------------------------------------------------------------------------------------------------------------------------------------------------------------------------------------------------------------------------------------------------------------------------------------------------------------------------------------------------------------------------------------------------------------------------------------------------------------------------------------------------------------------------------------------------------------------------------------------------------------------------------------------------------------------------------------------------------------------------------------------------------------------------------------------------------------------------------------------------------------------|
|             | 17. #16 AND ((clinicaltrial[Filter]) AND (humans[Filter]))                                                                                                                                                                                                                                                                                                                                                                                                                                                                                                                                                                                                                                                                                                                                                                                                                                                                                                                                                                                                                                                                                                                                                                                                                                                                                                                                                                                                                                                                                                                                                                                                                                                                                                                                                                                                                                                                                                                                                                                                                                                                                                                                                                                                                                                                                                                                                                                                                                                |
| Database    | EMBASE                                                                                                                                                                                                                                                                                                                                                                                                                                                                                                                                                                                                                                                                                                                                                                                                                                                                                                                                                                                                                                                                                                                                                                                                                                                                                                                                                                                                                                                                                                                                                                                                                                                                                                                                                                                                                                                                                                                                                                                                                                                                                                                                                                                                                                                                                                                                                                                                                                                                                                    |
| Search time | October 9th 2021                                                                                                                                                                                                                                                                                                                                                                                                                                                                                                                                                                                                                                                                                                                                                                                                                                                                                                                                                                                                                                                                                                                                                                                                                                                                                                                                                                                                                                                                                                                                                                                                                                                                                                                                                                                                                                                                                                                                                                                                                                                                                                                                                                                                                                                                                                                                                                                                                                                                                          |
| Strategy    | <ol style="list-style-type: none"> <li>1. 'heart failure'/exp</li> <li>2. 'heart failure':ti,ab,kw OR 'cardiac failure':ti,ab,kw OR 'cardiac insufficiency':ti,ab,kw OR cardiomyopathy:ti,ab,kw</li> <li>3. #1 OR #2</li> <li>4. lcz696:ti,ab,kw OR 'lcz 696':ti,ab,kw OR valsartan:ti,ab,kw OR sacubitril:ti,ab,kw OR 'angiotensin receptor-neprilysin inhibitor':ti,ab,kw</li> <li>5. 'dipeptidyl carboxypeptidase inhibitor'/exp</li> <li>6. 'angiotensin converting enzyme inhibitor':ti,ab,kw OR acei:ti,ab,kw OR benazepril:ti,ab,kw OR captopril:ti,ab,kw OR enalapril:ti,ab,kw OR fosinopril:ti,ab,kw OR imidapril:ti,ab,kw OR lisinopril:ti,ab,kw OR moexipril:ti,ab,kw OR perindopril:ti,ab,kw OR quinapril:ti,ab,kw OR ramipril:ti,ab,kw ORtrandolapril:ti,ab,kw OR zofenopril:ti,ab,kw OR alacepril:ti,ab,kw OR cilazapril:ti,ab,kw OR spirapril:ti,ab,kw OR delapril:ti,ab,kw</li> <li>7. 'adrenergic receptor blocking agent'/exp</li> <li>8. 'beta blocker':ti,ab,kw OR bb:ti,ab,kw OR acebutolol:ti,ab,kw OR atenolol:ti,ab,kw OR betaxolol:ti,ab,kw OR bisoprolol:ti,ab,kw OR carvedilol:ti,ab,kw OR labetalol:ti,ab,kw OR metoprolol:ti,ab,kw OR nadolol:ti,ab,kw OR nebivolol:ti,ab,kw OR penbutolol:ti,ab,kw OR pindolol:ti,ab,kw OR propranolol:ti,ab,kw OR sotalol:ti,ab,kw OR timolol:ti,ab,kw</li> <li>9. 'mineralocorticoid antagonist'/exp</li> <li>10. 'aldosterone antagonist':ti,ab,kw OR 'mineralocorticoid-receptor antagonist':ti,ab,kw OR mra:ti,ab,kw OR eplerenone:ti,ab,kw OR spironolactone:ti,ab,kw</li> <li>11. 'angiotensin receptor antagonist'/exp</li> <li>12. 'angiotensin receptor blocker':ti,ab,kw OR 'angiotensin receptor antagonist':ti,ab,kw OR arb:ti,ab,kw OR azilsartan:ti,ab,kw OR candesartan:ti,ab,kw OR eprosartan:ti,ab,kw OR irbesartan:ti,ab,kw OR losartan:ti,ab,kw OR olmesartan:ti,ab,kw OR telmisartan:ti,ab,kw OR valsartan:ti,ab,kw</li> <li>13. 'sodium glucose cotransporter 2 inhibitor'/exp<br/>OR ertugliflozin:ti,ab,kw OR sotagliflozin:ti,ab,kw OR remogliflozin:ti,ab,kw OR ipragliflozin:ti,ab,kw OR tofogliflozin:ti,ab,kw</li> <li>14. 'sodium-glucose cotransporter 2 inhibitor':ti,ab,kw OR 'sodium-glucose transporter 2 inhibitor':ti,ab,kw OR empagliflozin:ti,ab,kw OR dapagliflozin:ti,ab,kw OR canagliflozin:ti,ab,kw</li> <li>15. #4 OR #5 OR #6 OR #7 OR #8 OR #9 OR #10 OR #11 OR #12 OR #13 OR #14</li> <li>16. #3 AND #15</li> <li>17. #16 AND ([adult]/lim OR [aged]/lim) AND 'clinical trial'/de</li> </ol> |
| Database    | CENTRAL                                                                                                                                                                                                                                                                                                                                                                                                                                                                                                                                                                                                                                                                                                                                                                                                                                                                                                                                                                                                                                                                                                                                                                                                                                                                                                                                                                                                                                                                                                                                                                                                                                                                                                                                                                                                                                                                                                                                                                                                                                                                                                                                                                                                                                                                                                                                                                                                                                                                                                   |
| Search time | October 9th 2021                                                                                                                                                                                                                                                                                                                                                                                                                                                                                                                                                                                                                                                                                                                                                                                                                                                                                                                                                                                                                                                                                                                                                                                                                                                                                                                                                                                                                                                                                                                                                                                                                                                                                                                                                                                                                                                                                                                                                                                                                                                                                                                                                                                                                                                                                                                                                                                                                                                                                          |
| Strategy    | <ol style="list-style-type: none"> <li>1. MeSH descriptor: [Heart Failure] explode all trees</li> <li>2. (heart failure or cardiac failure or cardiac insufficiency or cardiomyopathy):ti,ab,kw</li> <li>3. #1 or #2</li> </ol>                                                                                                                                                                                                                                                                                                                                                                                                                                                                                                                                                                                                                                                                                                                                                                                                                                                                                                                                                                                                                                                                                                                                                                                                                                                                                                                                                                                                                                                                                                                                                                                                                                                                                                                                                                                                                                                                                                                                                                                                                                                                                                                                                                                                                                                                           |

4. LCZ696 or LCZ 696 or LCZ-696 or valsartan or sacubitril or angiotensin receptor-neprilysin inhibitor):ti,ab,kw 2500
5. MeSH descriptor: [Angiotensin-Converting Enzyme Inhibitors] explode all trees
6. (angiotensin converting enzyme inhibitor or ACEI or ACEI or benazepril or captopril or enalapril or fosinopril or imidapril or lisinopril or moexipril or perindopril or quinapril or ramipril ortrandolapril or zofenopril or alacepril or cilazapril or spirapril or delapril):ti,ab,kw
- 7.MeSH descriptor: [Adrenergic beta-Antagonists] explode all trees
8. (beta blocker or BB or acebutolol or atenolol or betaxolol or bisoprolol or carvedilol or labetalol or metoprolol or nadolol or nebivolol or penbutolol or pindolol or propranolol or sotalol or timolol):ti,ab,kw
9. MeSH descriptor: [Mineralocorticoid Receptor Antagonists] explode all trees
10. (aldosterone antagonist or mineralocorticoid-receptor antagonist or MRA or eplerenone or spironolactone):ti,ab,kw
11. MeSH descriptor: [Angiotensin Receptor Antagonists] explode all trees
12. (angiotensin receptor blocker or angiotensin receptor antagonist or ARB or azilsartan or candesartan or eprosartan or irbesartan or losartan or olmesartan or telmisartan or valsartan):ti,ab,kw
- 13.MeSH descriptor: [Sodium-Glucose Transporter 2 Inhibitors] explode all trees
14. (sodium-glucose cotransporter 2 inhibitor or sodium-glucose transporter 2 inhibitor or empagliflozin or dapagliflozin or canagliflozin or ertugliflozin or sotagliflozin or remogliflozin or ipragliflozin or tofogliflozin):ti,ab,kw
15. #4 or #5 or #6 or #7 or #8 or #9 or #10 or #11 or #12 or #13 or #14
16. #3 and #15
17. human not animal
18. #16 and #17, in Trials

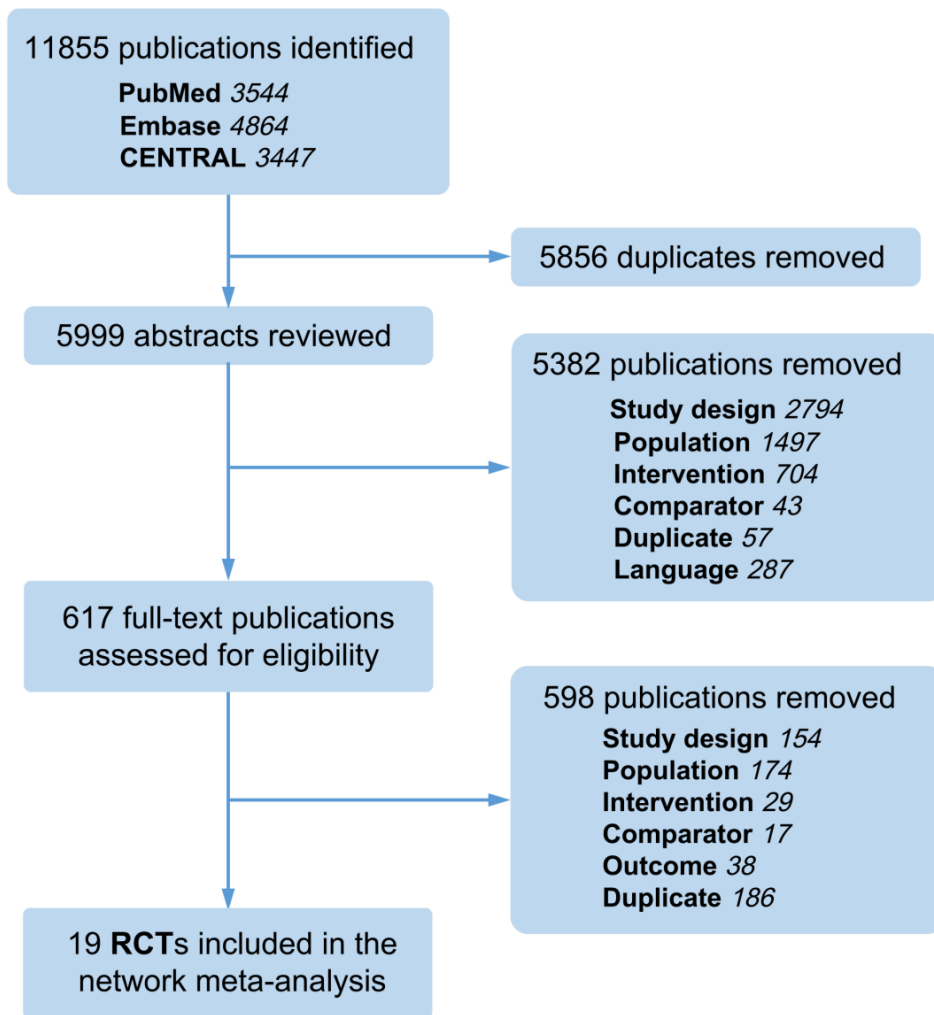

**eFigure 1.** Flowchart of Study Selection Process

| Trial/Author year      | Random sequence generation | Allocation concealment | Blinding of participants and personnel | Blinding of outcome assessment | Incomplete outcome data | Selective reporting | Other bias |
|------------------------|----------------------------|------------------------|----------------------------------------|--------------------------------|-------------------------|---------------------|------------|
| Aldo-DHF 2013          | Low                        | Low                    | Low                                    | Low                            | Low                     | Low                 | Low        |
| CHARM-Preserved 2003   | Unclear                    | Low                    | Low                                    | Low                            | Low                     | Low                 | Low        |
| ELANDD 2012            | Low                        | Unclear                | Low                                    | Unclear                        | Low                     | Low                 | Low        |
| EMPEROR-Preserved 2021 | Low                        | Low                    | Low                                    | Low                            | Low                     | Low                 | Low        |
| J-DHF 2013             | Unclear                    | Unclear                | High                                   | Low                            | Low                     | Low                 | Low        |
| Kasama 2004            | Unclear                    | Unclear                | Low                                    | Low                            | High                    | Low                 | Low        |
| Kitzman 2010           | Unclear                    | Unclear                | Low                                    | Low                            | Unclear                 | Unclear             | Low        |
| Parthasarathy 2009     | Low                        | Low                    | Low                                    | Low                            | Low                     | Low                 | Low        |
| McDiarmid 2019         | Low                        | Low                    | High                                   | High                           | High                    | Low                 | Low        |
| PARAGON-HF 2019        | Low                        | Low                    | Low                                    | Low                            | Low                     | Low                 | Low        |
| PARAMOUNT 2012         | Low                        | Low                    | Low                                    | Low                            | Low                     | Low                 | Low        |
| PEP-CHF 2006           | Low                        | Low                    | Low                                    | Low                            | Low                     | Low                 | Low        |
| SENIORS 2009           | Low                        | Low                    | Low                                    | Unclear                        | Low                     | Low                 | Low        |
| STRUCTURE 2016         | Unclear                    | Low                    | Low                                    | Low                            | Low                     | Unclear             | Low        |
| SWEDIC 2004            | Unclear                    | Unclear                | Low                                    | Unclear                        | Unclear                 | Unclear             | Low        |
| Takeda 2004            | Unclear                    | Unclear                | Unclear                                | Unclear                        | Unclear                 | Unclear             | Unclear    |
| TOPCAT 2014            | Low                        | Low                    | Low                                    | Low                            | Low                     | Low                 | Low        |
| Yip 2007               | Low                        | Low                    | High                                   | Low                            | Unclear                 | Low                 | Low        |
| Zi 2003                | Unclear                    | Unclear                | Low                                    | Unclear                        | Low                     | Unclear             | Low        |

eFigure 2. Bias Assessment of Eligible Studies

**A**

|                                    |                     |                     |                     |                     |                     |             |  |
|------------------------------------|---------------------|---------------------|---------------------|---------------------|---------------------|-------------|--|
| <b>SGLT2i</b>                      |                     |                     |                     |                     |                     |             |  |
| 1.02<br>(0.77-1.32)                | <b>ARNI</b>         |                     |                     |                     |                     |             |  |
| 0.10                               |                     |                     |                     |                     |                     |             |  |
| 1.10<br>(0.88-1.36)                | 1.10<br>(0.81-1.45) | <b>MRA</b>          |                     |                     |                     |             |  |
| 0.61                               | 0.46                |                     |                     |                     |                     |             |  |
| 1.09<br>(0.74-1.54)                | 1.08<br>(0.70-1.59) | 0.99<br>(0.66-1.42) | <b>BB</b>           |                     |                     |             |  |
| 0.33                               | 0.28                | 0.02                |                     |                     |                     |             |  |
| 0.98<br>(0.78-1.23)                | 0.97<br>(0.83-1.12) | 0.90<br>(0.70-1.14) | 0.93<br>(0.63-1.35) | <b>ARB</b>          |                     |             |  |
| 0.11                               | 0.30                | 0.60                | 0.26                |                     |                     |             |  |
| 0.98<br>(0.65-1.42)                | 0.98<br>(0.62-1.47) | 0.90<br>(0.59-1.32) | 0.93<br>(0.55-1.49) | 1.01<br>(0.66-1.48) | <b>ACEI</b>         |             |  |
| 0.07                               | 0.07                | 0.39                | 0.20                | 0.03                |                     |             |  |
| 1.00<br>(0.87-1.15)                | 1.00<br>(0.79-1.25) | 0.92<br>(0.77-1.08) | 0.95<br>(0.67-1.32) | 1.03<br>(0.86-1.23) | 1.06<br>(0.73-1.50) | <b>PLBO</b> |  |
| 0.03                               | 0.01                | 0.68                | 0.20                | 0.23                | 0.24                |             |  |
| <i>I<sup>2</sup>=0%; P&gt;0.05</i> |                     |                     |                     |                     |                     |             |  |

**B**

|                                    |                     |                     |                     |                     |                     |             |  |
|------------------------------------|---------------------|---------------------|---------------------|---------------------|---------------------|-------------|--|
| <b>SGLT2i</b>                      |                     |                     |                     |                     |                     |             |  |
| 1.02<br>(0.71-1.42)                | <b>ARNI</b>         |                     |                     |                     |                     |             |  |
| 0.09                               |                     |                     |                     |                     |                     |             |  |
| 1.02<br>(0.76-1.34)                | 1.02<br>(0.70-1.44) | <b>MRA</b>          |                     |                     |                     |             |  |
| 0.11                               | 0.09                |                     |                     |                     |                     |             |  |
| 1.09<br>(0.65-1.72)                | 1.09<br>(0.62-1.80) | 1.08<br>(0.63-1.72) | <b>BB</b>           |                     |                     |             |  |
| 0.25                               | 0.23                | 0.22                |                     |                     |                     |             |  |
| 0.97<br>(0.72-1.27)                | 0.95<br>(0.78-1.15) | 0.96<br>(0.70-1.28) | 0.94<br>(0.55-1.49) | <b>ARB</b>          |                     |             |  |
| 0.18                               | 0.35                | 0.21                | 0.19                |                     |                     |             |  |
| 0.99<br>(0.60-1.54)                | 0.99<br>(0.57-1.61) | 0.98<br>(0.58-1.54) | 0.96<br>(0.49-1.71) | 1.04<br>(0.62-1.63) | <b>ACEI</b>         |             |  |
| 0.03                               | 0.02                | 0.06                | 0.10                | 0.11                |                     |             |  |
| 0.91<br>(0.76-1.09)                | 0.92<br>(0.68-1.21) | 0.91<br>(0.73-1.12) | 0.89<br>(0.55-1.35) | 0.96<br>(0.77-1.19) | 0.97<br>(0.61-1.48) | <b>PLBO</b> |  |
| 0.67                               | 0.43                | 0.63                | 0.39                | 0.28                | 0.08                |             |  |
| <i>I<sup>2</sup>=0%; P&gt;0.05</i> |                     |                     |                     |                     |                     |             |  |

**C**

|                                    |                                   |                                   |                     |                     |                     |             |  |
|------------------------------------|-----------------------------------|-----------------------------------|---------------------|---------------------|---------------------|-------------|--|
| <b>SGLT2i</b>                      |                                   |                                   |                     |                     |                     |             |  |
| 0.94<br>(0.71-1.23)                | <b>ARNI</b>                       |                                   |                     |                     |                     |             |  |
| 0.31                               |                                   |                                   |                     |                     |                     |             |  |
| 0.86<br>(0.67-1.09)                | 0.93<br>(0.69-1.22)               | <b>MRA</b>                        |                     |                     |                     |             |  |
| 0.77                               | 0.39                              |                                   |                     |                     |                     |             |  |
| 0.96<br>(0.50-1.68)                | 1.03<br>(0.52-1.83)               | 1.12<br>(0.58-1.97)               | <b>BB</b>           |                     |                     |             |  |
| 0.11                               | 0.06                              | 0.27                              |                     |                     |                     |             |  |
| 0.85<br>(0.67-1.07)                | 0.91<br>(0.79-1.04)               | 1.00<br>(0.77-1.27)               | 0.96<br>(0.50-1.64) | <b>ARB</b>          |                     |             |  |
| 0.81                               | 0.84                              | 0.02                              | 0.11                |                     |                     |             |  |
| 0.86<br>(0.60-1.21)                | 0.93<br>(0.62-1.33)               | 1.01<br>(0.69-1.43)               | 0.97<br>(0.48-1.75) | 1.02<br>(0.71-1.44) | <b>ACEI</b>         |             |  |
| 0.58                               | 0.29                              | 0.04                              | 0.06                | 0.09                |                     |             |  |
| <b>0.71</b><br><i>(0.60-0.83)</i>  | <b>0.76</b><br><i>(0.61-0.95)</i> | <b>0.83</b><br><i>(0.69-0.99)</i> | 0.82<br>(0.44-1.40) | 0.84<br>(0.71-1.00) | 0.85<br>(0.61-1.15) | <b>PLBO</b> |  |
| <b>1.00</b>                        | <b>0.98</b>                       | <b>0.95</b>                       | 0.48                | 0.94                | 0.69                |             |  |
| <i>I<sup>2</sup>=0%; P&gt;0.05</i> |                                   |                                   |                     |                     |                     |             |  |

**eFigure 3.** Primary Network Meta-Analysis Results for All-Cause Death (A), Cardiovascular Death (B) and Hospitalization for Heart Failure (C). The hazard ratio, 95% credible interval, and the probability (P score) that the intervention is more effective than the comparator are presented for each pairwise comparison. Results are shown in bold and italics if they are statistically significant. No significant heterogeneity ( $I^2$ ) or inconsistency ( $P$ -value) for three outcomes was found.

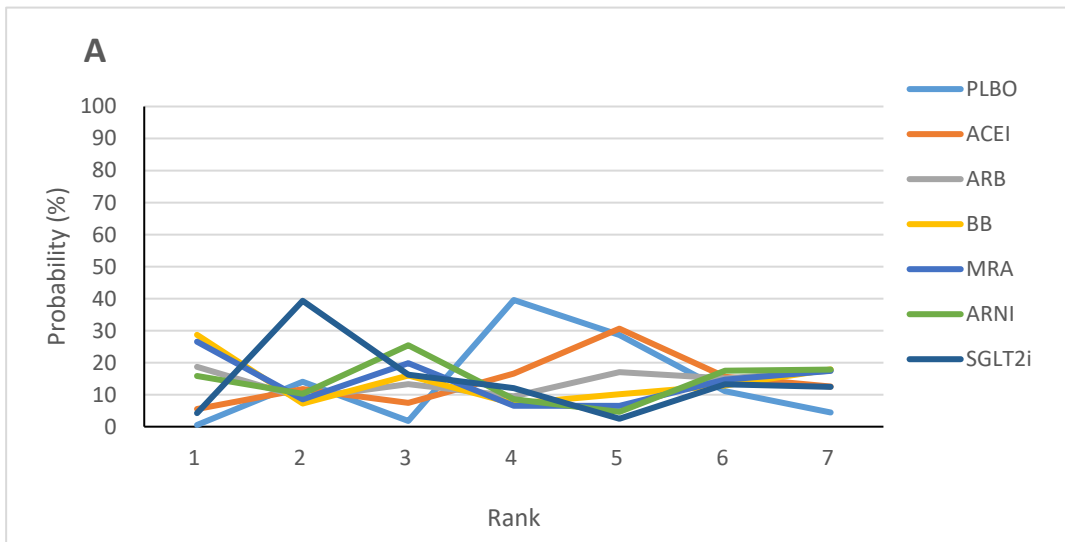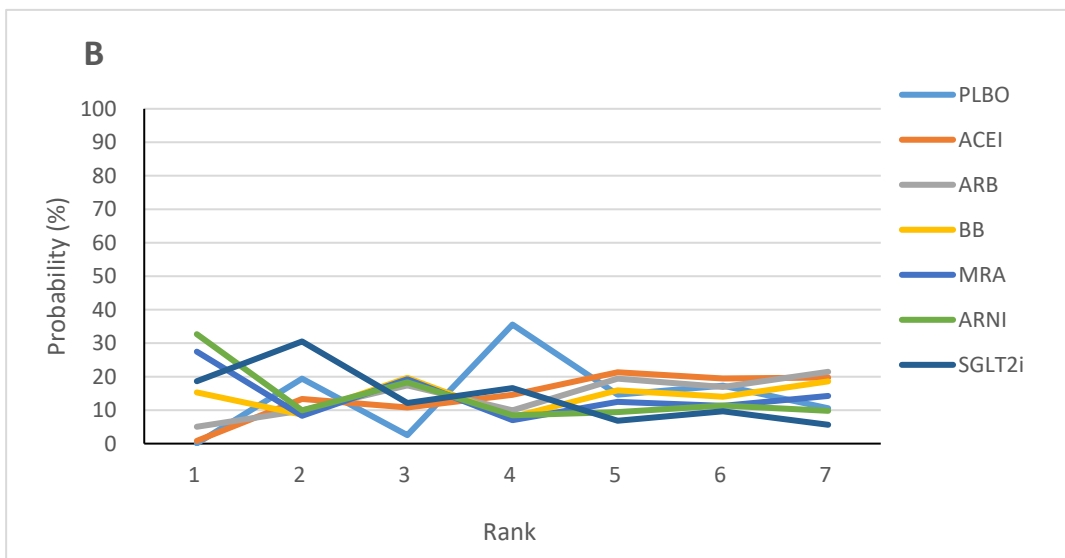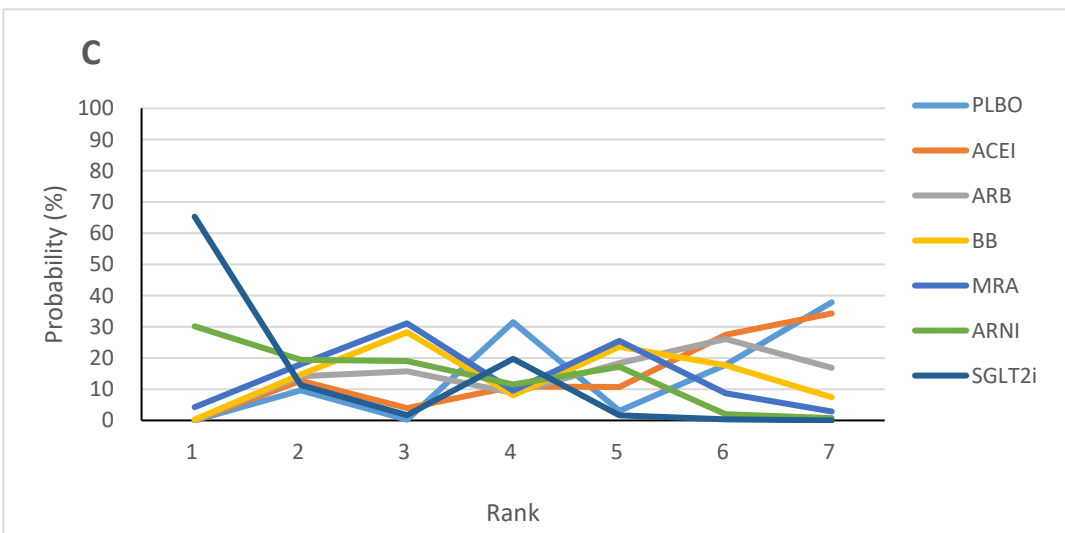

**eFigure 4.** Rankogram Plot for All-Cause Mortality (A), Cardiovascular Mortality (B), and Hospitalization for Heart Failure (C) in the Primary Analysis.



**A**

|                           |                        |                     |                     |                     |                     |             |  |
|---------------------------|------------------------|---------------------|---------------------|---------------------|---------------------|-------------|--|
| <b>ASI+BB<br/>+SGLT2i</b> |                        |                     |                     |                     |                     |             |  |
| 1.10<br>(0.88-1.36)       | <b>ASI+BB<br/>+MRA</b> |                     |                     |                     |                     |             |  |
| 0.61                      |                        |                     |                     |                     |                     |             |  |
| 1.04<br>(0.84-1.27)       | 0.95<br>(0.75-1.18)    | <b>ARNI+BB</b>      |                     |                     |                     |             |  |
| 0.27                      | 0.32                   |                     |                     |                     |                     |             |  |
| 1.00<br>(0.87-1.15)       | 0.92<br>(0.77-1.08)    | 0.97<br>(0.83-1.12) | <b>ASI+BB</b>       |                     |                     |             |  |
| 0.03                      | 0.69                   | 0.30                |                     |                     |                     |             |  |
| 1.05<br>(0.84-1.29)       | 0.96<br>(0.75-1.20)    | 1.01<br>(0.81-1.25) | 1.04<br>(0.88-1.22) | <b>BB</b>           |                     |             |  |
| 0.31                      | 0.28                   | 0.07                | 0.38                |                     |                     |             |  |
| 0.95<br>(0.65-1.34)       | 0.87<br>(0.59-1.25)    | 0.92<br>(0.63-1.31) | 0.95<br>(0.67-1.31) | 0.92<br>(0.62-1.31) | <b>ASI</b>          |             |  |
| 0.19                      | 0.52                   | 0.32                | 0.22                | 0.34                |                     |             |  |
| 0.31<br>(0.03-1.11)       | 0.28<br>(0.02-1.02)    | 0.30<br>(0.03-1.07) | 0.31<br>(0.03-1.10) | 0.30<br>(0.03-1.08) | 0.33<br>(0.03-1.16) | <b>PLBO</b> |  |
| 0.78                      | 0.81                   | 0.79                | 0.78                | 0.79                | 0.76                |             |  |
| $I^2=0\%$ ; $P=NA$        |                        |                     |                     |                     |                     |             |  |

**B**

|                                   |                                   |                                   |                                   |                     |                     |             |  |
|-----------------------------------|-----------------------------------|-----------------------------------|-----------------------------------|---------------------|---------------------|-------------|--|
| <b>ASI+BB<br/>+SGLT2i</b>         |                                   |                                   |                                   |                     |                     |             |  |
| 0.86<br>(0.67-1.09)               | <b>ASI+BB<br/>+MRA</b>            |                                   |                                   |                     |                     |             |  |
| 0.77                              |                                   |                                   |                                   |                     |                     |             |  |
| <b>0.79</b><br><i>(0.64-0.97)</i> | 0.92<br>(0.73-1.15)               | <b>ARNI+BB</b>                    |                                   |                     |                     |             |  |
| <b>0.97</b>                       | 0.50                              |                                   |                                   |                     |                     |             |  |
| <b>0.71</b><br><i>(0.60-0.83)</i> | <b>0.83</b><br><i>(0.69-0.99)</i> | 0.91<br>(0.79-1.04)               | <b>ASI+BB</b>                     |                     |                     |             |  |
| <b>1.00</b>                       | <b>0.95</b>                       | 0.84                              |                                   |                     |                     |             |  |
| <b>0.60</b><br><i>(0.48-0.75)</i> | <b>0.71</b><br><i>(0.55-0.89)</i> | <b>0.77</b><br><i>(0.62-0.94)</i> | <b>0.85</b><br><i>(0.72-0.99)</i> | <b>BB</b>           |                     |             |  |
| <b>1.00</b>                       | <b>1.00</b>                       | <b>0.99</b>                       | <b>0.96</b>                       |                     |                     |             |  |
| <b>0.57</b><br><i>(0.30-0.98)</i> | 0.67<br>(0.35-1.15)               | 0.73<br>(0.38-1.24)               | 0.80<br>(0.43-1.34)               | 0.95<br>(0.50-1.64) | <b>ASI</b>          |             |  |
| <b>0.93</b>                       | 0.81                              | 0.71                              | 0.54                              | 0.11                |                     |             |  |
| 0.46<br>(0.15-1.12)               | 0.53<br>(0.17-1.31)               | 0.58<br>(0.19-1.41)               | 0.64<br>(0.21-1.55)               | 0.76<br>(0.25-1.85) | 0.80<br>(0.32-1.70) | <b>PLBO</b> |  |
| 0.87                              | 0.77                              | 0.71                              | 0.61                              | 0.39                | 0.39                |             |  |
| $I^2=0\%$ ; $P=NA$                |                                   |                                   |                                   |                     |                     |             |  |

**eFigure 5.** Sensitivity Analysis Results for All-Cause Death (A) and Hospitalization for Heart Failure (B). The hazard ratio, 95% credible interval, and the probability (P score) that the intervention is more effective than the comparator are presented for each pairwise comparison. Results are shown in bold and italics if they are statistically significant. No significant heterogeneity ( $I^2$ ) for two outcomes was found, and the inconsistency ( $P$ -value) was not available (NA).

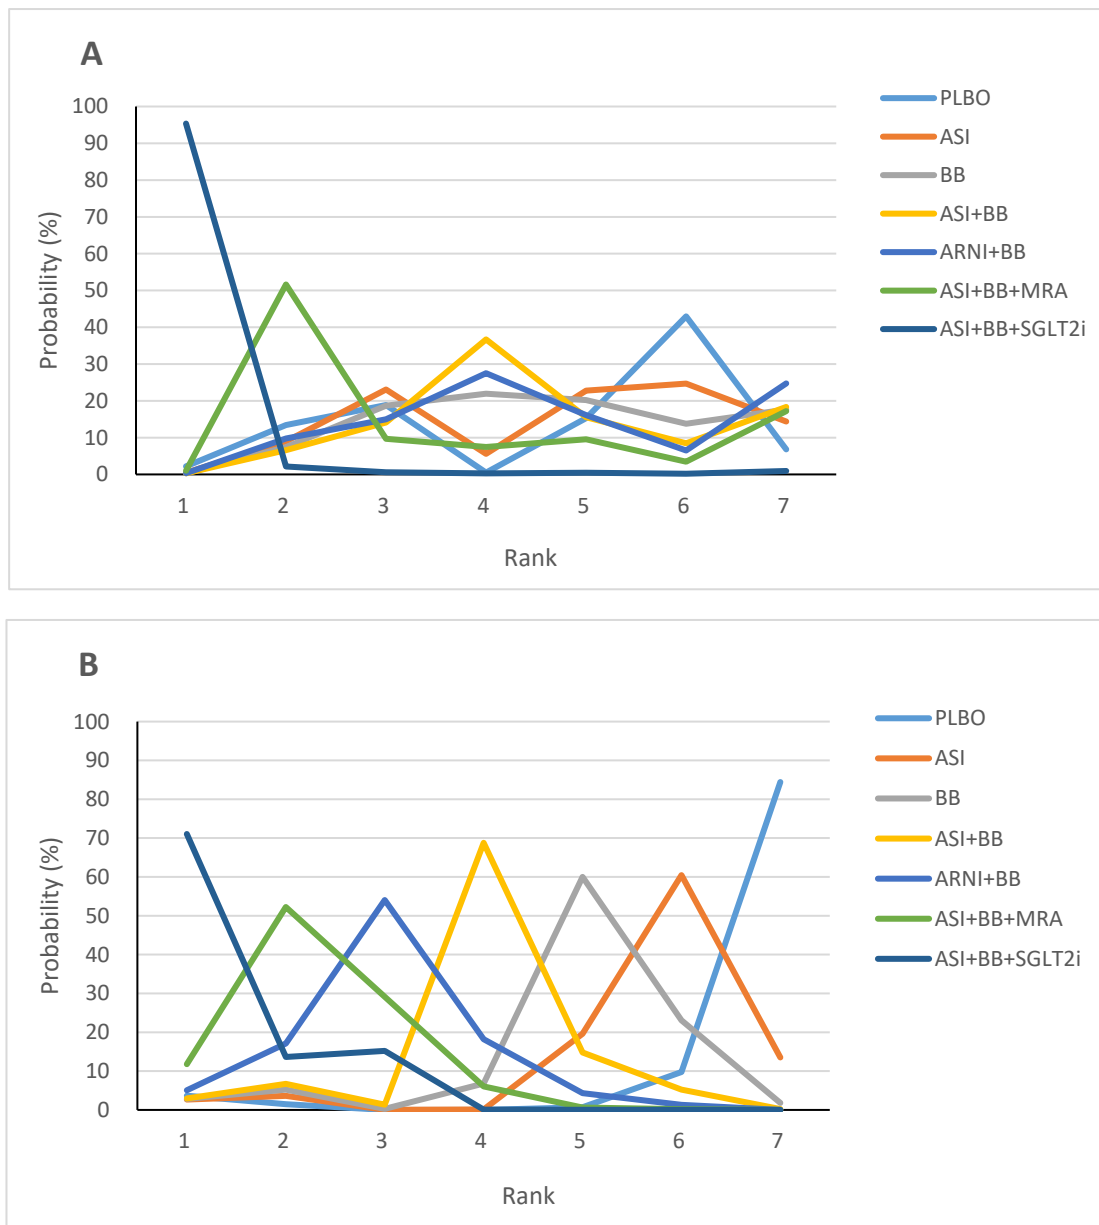

**eFigure 6.** Rankogram Plot for All-Cause Mortality (A) and Hospitalization for Heart Failure (B) in Sensitivity Analysis.

**eTable 1.** Study Characteristics of Included RCTs

| Trial/Author year                         | Study design | LVEF inclusion criteria | Median follow-up (moth) | Treatment            | Daily dose | Number | Mean       |                          |          |          |                                    | Female (%) | NYHA (%) |      |      |     | Ischemic HF (%) | HT (%) | AF (%) | DM (%) |
|-------------------------------------------|--------------|-------------------------|-------------------------|----------------------|------------|--------|------------|--------------------------|----------|----------|------------------------------------|------------|----------|------|------|-----|-----------------|--------|--------|--------|
|                                           |              |                         |                         |                      |            |        | Age (year) | BMI (kg/m <sup>2</sup> ) | HR (bpm) | LVEF (%) | eGFR (ml/min/1.73 m <sup>2</sup> ) |            | I        | II   | III  | IV  |                 |        |        |        |
| <b>PARAGON-HF 2019<sup>1</sup></b>        | DB, MC       | ≥45%                    | 35.0                    | Sacubitril-valsartan | 400 mg     | 2407   | 72.7       | 30.2                     | 70.6     | 57.6     | 63.0                               | 51.6       | 3.0      | 77.5 | 19.0 | 0.3 | 37.4            | 95.7   | 32.2   | 43.5   |
|                                           |              |                         |                         | Valsartan            | 320 mg     | 2389   | 72.8       | 30.3                     | 70.3     | 57.5     | 62.0                               | 51.8       | 2.7      | 77.0 | 19.8 | 0.5 | 34.5            | 95.4   | 32.5   | 42.5   |
| <b>PARAMOUNT 2012<sup>2</sup></b>         | DB, MC, PC   | ≥45%                    | 9.0                     | LCZ696               | 400 mg     | 149    | 70.9       | 30.1                     | 69.0     | 58.0     | 67.0                               | 57.0       | 1.0      | 81.0 | 19.0 | 0.0 | NA              | 95.0   | 27.0   | 41.0   |
|                                           |              |                         |                         | Valsartan            | 320 mg     | 152    | 71.2       | 29.8                     | 70.0     | 58.0     | 64.0                               | 56.0       | 1.0      | 78.0 | 21.0 | 0.0 | NA              | 92.0   | 30.0   | 35.0   |
| <b>EMPEROR-Preserved 2021<sup>3</sup></b> | DB, MC, PC   | > 40%                   | 26.2                    | Empagliflozin        | 10 mg      | 2997   | 71.8       | 29.8                     | 70.4     | 54.3     | 60.6                               | 44.6       | 0.1      | 81.1 | 18.4 | 0.3 | 36.0            | 90.8   | 51.5   | 48.9   |
|                                           |              |                         |                         | Placebo              | NA         | 2991   | 71.9       | 29.9                     | 70.3     | 54.3     | 60.6                               | 44.7       | 0.1      | 81.9 | 17.8 | 0.3 | 34.7            | 90.4   | 50.6   | 49.2   |
| <b>CHARM-Preserved 2003<sup>4</sup></b>   | DB, MC, PC   | > 40%                   | 36.3                    | Candesartan          | 32 mg      | 1514   | 67.2       | 29.3                     | 71.2     | 54.0     | NA                                 | 39.2       | 0.0      | 61.5 | 36.7 | 1.8 | 56.4            | 65.0   | 29.0   | 28.7   |
|                                           |              |                         |                         | Placebo              | NA         | 1509   | 67.1       | 29.0                     | 71.4     | 54.1     | NA                                 | 41.0       | 0.0      | 60.0 | 38.7 | 1.3 | 56.5            | 63.6   | 29.3   | 28.0   |
| <b>Kasama 2004<sup>5</sup></b>            | DB, PC       | > 40%                   | 6.0                     | Candesartan          | 8-12 mg    | 25     | 66.0       | NA                       | NA       | 54.0     | NA                                 | 32.0       | 0.0      | 64.0 | 36.0 | 0.0 | 0.0             | 64.0   | NA     | NA     |
|                                           |              |                         |                         | Placebo              | NA         | 25     | 67.0       | NA                       | NA       | 55.0     | NA                                 | 36.0       | 0.0      | 68.0 | 32.0 | 0.0 | 0.0             | 60.0   | NA     | NA     |
| <b>Parthasarathy 2009<sup>6</sup></b>     | DB, MC, PC   | ≥40%                    | 3.5                     | Valsartan            | 320 mg     | 68     | 61.0       | 31.0                     | NA       | 70.5     | NA                                 | 50.0       | NA       | NA   | NA   | NA  | NA              | 91.2   | 16.2   | 22.1   |
|                                           |              |                         |                         | Placebo              | NA         | 82     | 63.1       | 29.3                     | NA       | 71.5     | NA                                 | 50.0       | NA       | NA   | NA   | NA  | NA              | NA     | 89.0   | 9.8    |
| <b>TOPCAT 2014<sup>7</sup></b>            | DB, MC, PC   | ≥45%                    | 39.6                    | Spirololactone       | 15-45 mg   | 1722   | 68.7       | 31.0                     | 68.0     | 56.0     | 65.3                               | 51.6       | 3.3      | 63.3 | 33.0 | 0.4 | NA              | 91.0   | 35.5   | 32.8   |
|                                           |              |                         |                         | Placebo              | NA         | 1723   | 68.7       | 31.0                     | 68.0     | 56.0     | 65.5                               | 51.5       | 3.1      | 64.1 | 32.1 | 0.5 | NA              | 91.9   | 35.1   | 32.2   |
| <b>Aldo-DHF 2013<sup>8</sup></b>          | DB, MC, PC   | ≥50%                    | 11.6                    | Spirololactone       | 25 mg      | 213    | 67.0       | 28.9                     | 66.0     | 67.0     | 79.0                               | 52.0       | 0.0      | 85.0 | 15.0 | 0.0 | NA              | 92.0   | 6.0    | 17.0   |
|                                           |              |                         |                         | Placebo              | NA         | 209    | 67.0       | 28.9                     | 64.0     | 68.0     | 78.0                               | 53.0       | 0.0      | 88.0 | 12.0 | 0.0 | NA              | 91.0   | 4.0    | 16.0   |
| <b>McDiarmid 2019<sup>9</sup></b>         | DB, MC, PC   | > 50%                   | 6.0                     | Spirololactone       | 25 mg      | 19     | 76.4       | 29.8                     | 77.0     | 53.5     | NA                                 | 47.4       | 0.0      | 73.7 | 26.3 | 0.0 | NA              | 79.0   | 89.0   | NA     |
|                                           |              |                         |                         | Placebo              | NA         | 21     | 74.0       | 29.1                     | 74.5     | 54.8     | NA                                 | 52.4       | 0.0      | 81.0 | 19.0 | 0.0 | NA              | 62.0   | 71.0   | NA     |
| <b>STRUCTURE 2016<sup>10</sup></b>        | DB, SC, PC   | > 50%                   | 6.0                     | Spirololactone       | 25 mg      | 64     | 66.3       | 30.7                     | 72.0     | 72.6     | 64.3                               | 88.0       | 0.0      | 78.0 | 22.0 | 0.0 | NA              | 92.0   | NA     | 39.0   |
|                                           |              |                         |                         | Placebo              | NA         | 67     | 67.6       | 29.7                     | 73.0     | 71.4     | 63.5                               | 81.0       | 0.0      | 79.0 | 21.0 | 0.0 | NA              | 91.0   | NA     | 40.0   |

|                                  |            |       |      |                     |                   |     |      |      |      |      |      |      |      |      |      |     |      |      |      |      |
|----------------------------------|------------|-------|------|---------------------|-------------------|-----|------|------|------|------|------|------|------|------|------|-----|------|------|------|------|
| <b>PEP-CHF 2006<sup>11</sup></b> | DB, MC, PC | NA    | 26.2 | Perindopril         | 4 mg              | 424 | 75.0 | 27.5 | 74.0 | 65.0 | NA   | 54.0 | NA   | NA   | NA   | NA  | NA   | 79.0 | 19.0 | 21.0 |
|                                  |            |       |      | Placebo             | NA                | 426 | 75.0 | 27.6 | 73.0 | 64.0 | NA   | 57.0 | NA   | NA   | NA   | NA  | NA   | 79.0 | 22.0 | 20.0 |
| <b>Kitzman 2010<sup>12</sup></b> | DB, PC     | ≥50%  | 12.0 | Enalapril           | 20 mg             | 35  | 69.0 | 30.0 | NA   | 65.0 | NA   | 80.0 | 0.0  | 83.0 | 17.0 | 0.0 | NA   | 71.0 | NA   | 9.0  |
|                                  |            |       |      | Placebo             | NA                | 36  | 70.0 | 30.0 | NA   | 65.0 | NA   | 89.0 | 0.0  | 75.0 | 25.0 | 0.0 | NA   | 75.0 | NA   | 17.0 |
| <b>Yip 2007<sup>13</sup></b>     | DB, MC, PC | > 45% | 12.0 | Ramipril+Diuretic   | R:10 mg;<br>D: NA | 45  | 74.0 | 26.8 | 79.0 | 65.0 | NA   | 60.0 | 0.0  | 66.7 | 33.3 | 0.0 | 16.0 | 73.0 | 16.0 | 22.0 |
|                                  |            |       |      | Irbesartan+Diuretic | I:75 mg;<br>D:NA  | 56  | 75.0 | 27.2 | 77.0 | 66.0 | NA   | 66.0 | 0.0  | 67.9 | 30.4 | 0.0 | 7.0  | 71.0 | 21.0 | 18.0 |
|                                  |            |       |      | Diuretic            | NA                | 50  | 73.0 | 26.8 | 76.0 | 69.0 | NA   | 58.0 | 0.0  | 72.0 | 28.0 | 0.0 | 12.0 | 76.0 | 10.0 | 20.0 |
| <b>Zi 2003<sup>14</sup></b>      | DB, MC, PC | ≥40%  | 6.0  | Quinapril           | 5-40 mg           | 36  | 77.0 | 28.5 | NA   | 59.3 | NA   | 61.1 | 5.5  | 77.8 | 16.7 | 0.0 | NA   | 27.8 | 38.9 | 11.1 |
|                                  |            |       |      | Placebo             | NA                | 38  | 78.0 | 27.0 | NA   | 58.0 | NA   | 68.4 | 0.0  | 73.7 | 26.3 | 0.0 | NA   | 31.6 | 31.6 | 18.4 |
| <b>ELANDD 2012<sup>15</sup></b>  | DB, MC, PC | > 45% | 6.0  | Nebivolol           | 5-10 mg           | 57  | 66.5 | 30.3 | NA   | 61.9 | NA   | 65.0 | 0.0  | 77.0 | 23.0 | 0.0 | 17.0 | 86.0 | NA   | 21.0 |
|                                  |            |       |      | Placebo             | NA                | 59  | 65.3 | 30.2 | NA   | 63.2 | NA   | 64.0 | 0.0  | 78.0 | 22.0 | 0.0 | 20.0 | 86.4 | NA   | 20.0 |
| <b>J-DHF 2013<sup>16</sup></b>   | DB, MC, PC | > 40% | 38.4 | Carvedilol          | 2.5-20 mg         | 120 | 73.0 | 24.2 | 72.0 | 62.0 | 58.0 | 42.5 | 18.3 | 69.2 | 10.8 | 2.0 | 17.5 | 80.0 | 50.8 | 27.5 |
|                                  |            |       |      | Placebo             | NA                | 125 | 71.0 | 24.1 | 74.0 | 63.0 | 58.3 | 41.6 | 18.4 | 75.2 | 4.8  | 1.6 | 12.0 | 80.8 | 45.6 | 33.6 |
| <b>SWEDIC 2004<sup>17</sup></b>  | DB, MC, PC | > 45% | 6.0  | Carvedilol          | 50-100 mg         | 47  | 67.0 | NA   | 74.0 | NA   | NA   | 40.4 | 40.0 | 53.0 | 7.0  | 0.0 | NA   | 70.2 | NA   | 12.8 |
|                                  |            |       |      | Placebo             | NA                | 50  | 66.0 | NA   | 73.0 | NA   | NA   | 46.0 | 26.0 | 53.0 | 21.0 | 0.0 | NA   | 62.0 | NA   | 16.0 |
| <b>Takeda 2004<sup>18</sup></b>  | SC         | ≥45%  | 12.0 | Carvedilol          | ≥5 mg             | 19  | 69.1 | NA   | 70.6 | 55.8 | NA   | 32.0 | 0.0  | 63.2 | 36.8 | 0.0 | NA   | 63.0 | 21.0 | NA   |
|                                  |            |       |      | No treatment        | NA                | 21  | 73.1 | NA   | 68.9 | 57.5 | NA   | 62.0 | 0.0  | 71.4 | 28.6 | 0.0 | NA   | 57.0 | 38.0 | NA   |
| <b>SENIORS 2009<sup>19</sup></b> | DB, MC, PC | ≥40%  | 21.0 | Nebivolol           | 10 mg             | 320 | 76.0 | NA   | 78.1 | 49.3 | 68.7 | 50.8 | 4.0  | 62.1 | 32.4 | 1.6 | NA   | 76.6 | 35.0 | 22.9 |
|                                  |            |       |      | Placebo             | NA                | 323 | 76.2 | NA   | 78.4 | 49.1 | 66.7 | 48.9 | 3.0  | 62.9 | 32.0 | 2.2 | NA   | 78.8 | 37.1 | 25.8 |

Abbreviations: AF, atrial fibrillation; BMI, body mass index; DB, double blind; DM, diabetes mellitus; eGFR, estimated glomerular filtration rate; HF, heart failure; HR, heart rate; HT, hypertension; LVEF, left ventricular ejection fraction; MC, multi-center; NA, not available; NYHA, New York Heart Association; PC, placebo controlled; SC, single centre.

| <b>eTable 2. Baseline Characteristics of Included Intervention and Concomitant Drug Classes Reported</b> |                           |                      |                 |                |               |                |
|----------------------------------------------------------------------------------------------------------|---------------------------|----------------------|-----------------|----------------|---------------|----------------|
| <b>Trial/Author year</b>                                                                                 | <b>Intervention class</b> | <b>Treatment</b>     | <b>ACEI (%)</b> | <b>ARB (%)</b> | <b>BB (%)</b> | <b>MRA (%)</b> |
| <b>PARAGON-HF 2019</b>                                                                                   | ARNI+BB                   | Sacubitril-valsartan | 86.2*           | 86.2*          | 79.9          | 24.6           |
|                                                                                                          | ASI+BB                    | Valsartan            | 86.4*           | 86.4*          | 79.5          | 27.1           |
| <b>PARAMOUNT 2012</b>                                                                                    | ARNI+BB                   | LCZ696               | 56.0            | 38.0           | 79.0          | 19.0           |
|                                                                                                          | ASI+BB                    | Valsartan            | 53.0            | 41.0           | 80.0          | 23.0           |
| <b>EMPEROR-Preserved 2021</b>                                                                            | SGLT2i+ASI+BB             | Empagliflozin        | 78.8*           | 78.8*          | 86.7          | 37.3           |
|                                                                                                          | ASI+BB                    | Placebo              | 78.1*           | 78.1*          | 85.9          | 37.6           |
| <b>CHARM-Preserved 2003</b>                                                                              | ASI+BB                    | Candesartan          | 19.6            | NA             | 55.9          | 11.3           |
|                                                                                                          | BB                        | Placebo              | 18.6            | NA             | 55.5          | 12.0           |
| <b>Kasama 2004</b>                                                                                       | ASI                       | Candesartan          | 92.0            | NA             | 12.0          | 16.0           |
|                                                                                                          | PLBO                      | Placebo              | 96.0            | NA             | 12.0          | 20.0           |
| <b>Parthasarathy 2009</b>                                                                                | ASI                       | Valsartan            | 41.2            | NA             | 33.8          | NA             |
|                                                                                                          | PLBO                      | Placebo              | 37.9            | NA             | 34.1          | NA             |
| <b>TOPCAT 2014</b>                                                                                       | ASI+BB+MRA                | Spirolactone         | 84.3*           | 84.3*          | 78.2          | NA             |
|                                                                                                          | ASI+BB                    | Placebo              | 84.2*           | 84.2*          | 77.3          | NA             |
| <b>Aldo-DHF 2013</b>                                                                                     | ASI+BB+MRA                | Spirolactone         | 78.0*           | 78.0*          | 69.0          | NA             |
|                                                                                                          | ASI+BB                    | Placebo              | 76.0*           | 76.0*          | 75.0          | NA             |
| <b>McDiarmid 2019</b>                                                                                    | ASI+BB+MRA                | Spirolactone         | 58.0*           | 58.0*          | 53.0          | NA             |
|                                                                                                          | ASI+BB                    | Placebo              | 57.0*           | 57.0*          | 67.0          | NA             |
| <b>STRUCTURE 2016</b>                                                                                    | ASI+BB+MRA                | Spirolactone         | 97.0*           | 97.0*          | 78.0          | NA             |
|                                                                                                          | ASI+BB                    | Placebo              | 95.0*           | 95.0*          | 72.0          | NA             |
| <b>PEP-CHF 2006</b>                                                                                      | ASI+BB                    | Perindopril          | NA              | NA             | 55.0          | 9.0            |
|                                                                                                          | BB                        | Placebo              | NA              | NA             | 54.0          | 11.0           |
| <b>Kitzman 2010</b>                                                                                      | ASI                       | Enalapril            | NA              | NA             | 29.0          | NA             |
|                                                                                                          | PLBO                      | Placebo              | NA              | NA             | 39.0          | NA             |
| <b>Yip 2007</b>                                                                                          | ASI                       | Ramipril+Diuretic    | NA              | NA             | NA            | NA             |
|                                                                                                          | ASI                       | Irbesartan+Diuretic  | NA              | NA             | NA            | NA             |
|                                                                                                          | PLBO                      | Diuretic             | NA              | NA             | NA            | NA             |
| <b>Zi 2003</b>                                                                                           | ASI                       | Quinapril            | NA              | NA             | 19.4          | NA             |
|                                                                                                          | PLBO                      | Placebo              | NA              | NA             | 7.9           | NA             |
| <b>ELANDD 2012</b>                                                                                       | ASI+BB                    | Nebivolol            | 75.0*           | 75.0*          | NA            | NA             |

|                     |        |              |       |       |    |      |
|---------------------|--------|--------------|-------|-------|----|------|
|                     | ASI    | Placebo      | 80.0* | 80.0* | NA | NA   |
| <b>J-DHF 2013</b>   | ASI+BB | Carvedilol   | 24.2  | 50.8  | NA | 20.8 |
|                     | ASI    | Placebo      | 22.4  | 56.0  | NA | 25.6 |
| <b>SWEDIC 2004</b>  | ASI+BB | Carvedilol   | >50%  | NA    | NA | NA   |
|                     | ASI    | Placebo      | >50%  | NA    | NA | NA   |
| <b>Takeda 2004</b>  | ASI+BB | Carvedilol   | 79.0  | NA    | NA | NA   |
|                     | ASI    | No treatment | 86.0  | NA    | NA | NA   |
| <b>SENIORS 2009</b> | ASI+BB | Nebivolol    | 86.8  | 5.8   | NA | 20.3 |
|                     | ASI    | Placebo      | 85.0  | 5.4   | NA | 16.9 |

\* indicates the combined reporting of the use of ACEI and ARB. Abbreviations: ACEI, angiotensin-converting enzyme inhibitor; ARB, angiotensin receptor blocker; ARNI, angiotensin receptor-neprilysin inhibitor; ASI, angiotensin system inhibitor (ACEI/ARB); BB, beta-blocker; HF, heart failure; MRA, mineralocorticoid receptor antagonist; NA, not available; PLBO, placebo; SGLT2i, sodium-glucose cotransporter 2 inhibitor.

**eTable 3.** Additional Sensitivity Analysis

|        | <b>Kasama 2004</b> | <b>Kitzman 2010</b> | <b>Zi 2003</b>   | <b>Takeda 2004</b> | <b>No removal</b> |
|--------|--------------------|---------------------|------------------|--------------------|-------------------|
| SGLT2i | 0.71 (0.60-0.84)   | 0.71 (0.60-0.83)    | 0.71 (0.60-0.83) | 0.71 (0.60-0.83)   | 0.71 (0.60-0.83)  |
| ARNI   | 0.77 (0.61-0.95)   | 0.76 (0.61-0.95)    | 0.77 (0.61-0.95) | 0.76 (0.61-0.95)   | 0.76 (0.61-0.95)  |
| MRA    | 0.83 (0.69-0.99)   | 0.83 (0.69-0.99)    | 0.83 (0.69-0.99) | 0.83 (0.69-0.99)   | 0.83 (0.69-0.99)  |
| BB     | 0.80 (0.44-1.34)   | 0.80 (0.44-1.34)    | 0.80 (0.44-1.34) | 0.82 (0.44-1.39)   | 0.82 (0.44-1.40)  |
| ARB    | 0.84 (0.71-1.00)   | 0.84 (0.71-1.00)    | 0.84 (0.71-1.00) | 0.84 (0.70-1.00)   | 0.84 (0.71-1.00)  |
| ACEI   | 0.85 (0.61-1.15)   | 0.85 (0.61-1.15)    | 0.87 (0.63-1.19) | 0.85 (0.61-1.15)   | 0.85 (0.61-1.15)  |
| PLBO   | 1.00               | 1.00                | 1.00             | 1.00               | 1.00              |

The network meta-analysis results for HF hospitalization after removing certain studies with small sample sizes (n <100) are presented. Abbreviations: ACEI, angiotensin-converting enzyme inhibitor; ARB, angiotensin receptor blocker; ARNI, angiotensin receptor-neprilysin inhibitor; BB, beta-blocker; MRA, mineralocorticoid receptor antagonist; PLBO, placebo; SGLT2i, sodium-glucose cotransporter 2 inhibitor.

## eReferences

1. Solomon SD, McMurray JJV, Anand IS, Ge J, Lam CSP. Angiotensin-Neprilysin Inhibition in Heart Failure with Preserved Ejection Fraction. *N Engl J Med*. 2019; 381:1609-1620.
2. Solomon SD, Zile M, Pieske B, Voors A, Shah A. The angiotensin receptor neprilysin inhibitor LCZ696 in heart failure with preserved ejection fraction: a phase 2 double-blind randomised controlled trial. *Lancet*. 2012;380:1387-1395.
3. Anker SD, Butler J, Filippatos G, Ferreira JP, Bocchi E. Empagliflozin in Heart Failure with a Preserved Ejection Fraction. *N Engl J Med*. 2021;385:1451-1461.
4. Yusuf S, Pfeffer MA, Swedberg K, Granger CB, Held P. Effects of candesartan in patients with chronic heart failure and preserved left-ventricular ejection fraction: the CHARM-Preserved Trial. *Lancet*. 2003;362:777-781.
5. Kasama S, Toyama T, Kumakura H, Takayama Y, Ichikawa S. Effects of candesartan on cardiac sympathetic nerve activity in patients with congestive heart failure and preserved left ventricular ejection fraction. *J Am Coll Cardiol*. 2005;45:661-667.
6. Parthasarathy HK, Pieske B, Weisskopf M, Andrews CD, Brunel P. A randomized, double-blind, placebo-controlled study to determine the effects of valsartan on exercise time in patients with symptomatic heart failure with preserved ejection fraction. *Eur J Heart Fail*. 2009;11:980-989.
7. Pitt B, Pfeffer MA, Assmann SF, Boineau R, Anand IS. Spironolactone for heart failure with preserved ejection fraction. *N Engl J Med*. 2014;370:1383-1392.
8. Edelmann F, Wachter R, Schmidt AG, Kraigher-Krainer E, Colantonio C. Effect of spironolactone on diastolic function and exercise capacity in patients with heart failure with preserved ejection fraction: the Aldo-DHF randomized controlled trial. *Jama*. 2013;309:781-791.
9. McDiarmid AK, Swoboda PP, Erhayiem B, Bounford KA, Bijsterveld P. Myocardial Effects of Aldosterone Antagonism in Heart Failure With Preserved Ejection Fraction. *J Am Heart Assoc*. 2020;9:e011521.
10. Kosmala W, Rojek A, Przewlocka-Kosmala M, Wright L, Mysiak A, Marwick TH. Effect of Aldosterone Antagonism on Exercise Tolerance in Heart Failure With Preserved Ejection Fraction. *J Am Coll Cardiol*. 2016;68:1823-1834.
11. Cleland JG, Tendera M, Adamus J, Freemantle N, Polonski L, Taylor J. The perindopril in elderly people with chronic heart failure (PEP-CHF) study. *Eur Heart J*. 2006;27:2338-2345.
12. Kitzman DW, Hundley WG, Brubaker PH, Morgan TM, Moore JB. A randomized double-blind trial of enalapril in older patients with heart failure and preserved ejection fraction: effects on exercise tolerance and arterial distensibility. *Circ Heart Fail*. 2010;3:477-485.
13. Yip GW, Wang M, Wang T, Chan S, Fung JW. The Hong Kong diastolic heart failure study: a randomised controlled trial of diuretics, irbesartan and ramipril on quality of life, exercise capacity, left ventricular global and regional function in heart failure with a normal ejection fraction. *Heart*. 2008;94:573-580.
14. Zi M, Carmichael N, Lye M. The effect of quinapril on functional status of elderly patients with diastolic heart failure. *Cardiovasc Drugs Ther*. 2003;17:133-139.



15. Conraads VM, Metra M, Kamp O, De Keulenaer GW, Pieske B. Effects of the long-term administration of nebivolol on the clinical symptoms, exercise capacity, and left ventricular function of patients with diastolic dysfunction: results of the ELANDD study. *Eur J Heart Fail.* 2012;14:219-225.
16. Yamamoto K, Origasa H, Hori M. Effects of carvedilol on heart failure with preserved ejection fraction: the Japanese Diastolic Heart Failure Study (J-DHF). *Eur J Heart Fail.* 2013;15:110-118.
17. Bergström A, Andersson B, Edner M, Nylander E, Persson H, Dahlström U. Effect of carvedilol on diastolic function in patients with diastolic heart failure and preserved systolic function. Results of the Swedish Doppler-echocardiographic study (SWEDIC). *Eur J Heart Fail.* 2004;6:453-461.
18. Takeda Y, Fukutomi T, Suzuki S, Yamamoto K, Ogata M. Effects of carvedilol on plasma B-type natriuretic peptide concentration and symptoms in patients with heart failure and preserved ejection fraction. *Am J Cardiol.* 2004;94:448-453.
19. van Veldhuisen DJ, Cohen-Solal A, Böhm M, Anker SD, Babalis D. Beta-blockade with nebivolol in elderly heart failure patients with impaired and preserved left ventricular ejection fraction: Data From SENIORS (Study of Effects of Nebivolol Intervention on Outcomes and Rehospitalization in Seniors With Heart Failure). *J Am Coll Cardiol.* 2009;53:2150-2158.
